# Supplementary material for: Novel gold-decorated polyaniline derivatives as redox-active species for simultaneous detection of three biomarkers of lung cancer
Source: Royal Society of Chemistry journal article supplement (doi:10.1039/c5tb00001g), 2015-01-01
Supplement: c5tb00001g1.pdf [file c5tb00001g1.pdf]

## Novel gold-decorated polyaniline derivatives as redox-active species for simultaneous detection of three biomarkers of lung cancer

Liyuan Wang<sup>a</sup>, Na Liu<sup>a,b</sup>, Zhanfang Ma<sup>a\*</sup>

<sup>a</sup>Department of Chemistry, Capital Normal University, Beijing, 100048, China

<sup>b</sup>College of Life Science, Capital Normal University, Beijing, 100048, China

E-mail: mazhanfang@cnu.edu.cn

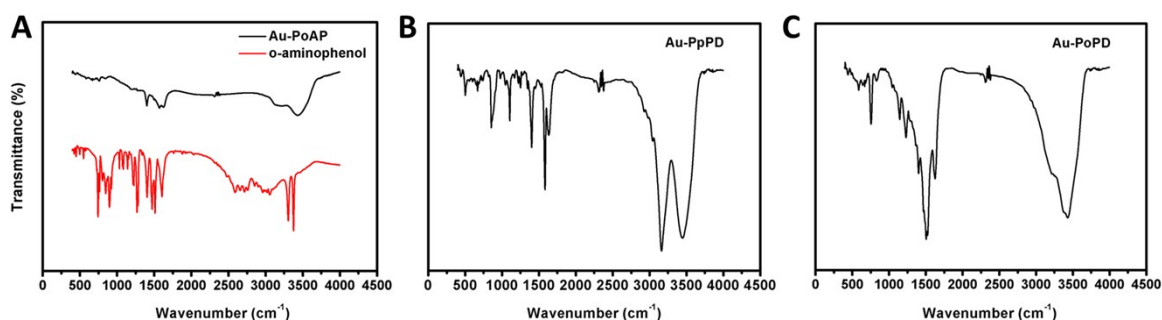

**Fig. S1.** FTIR spectrum of (A) Au-PoAP and o-aminophenol, (B) Au-PpPD, and (C) Au-PoPD.

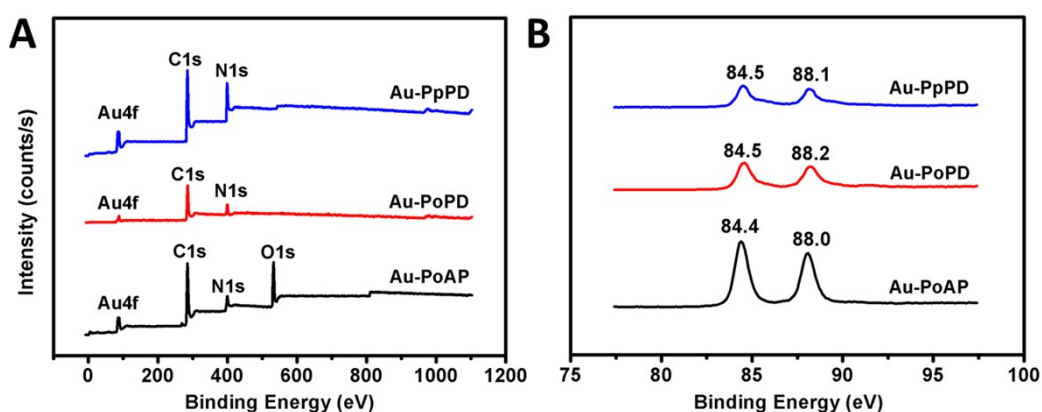

**Fig. S2.** XPS spectrum of (A) Au-PoPD, Au-PoAP and Au-PpPD, high-resolution XPS of (B) Au 4f spectrum of Au-PANI derivatives.

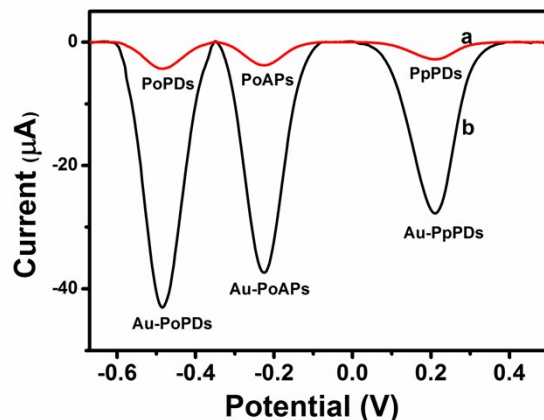

**Fig. S3** SWV response to PoPD, PoAP and PpPD (curve a), and Au-PoPD, Au-PoAP and Au-PpPD (curve b).

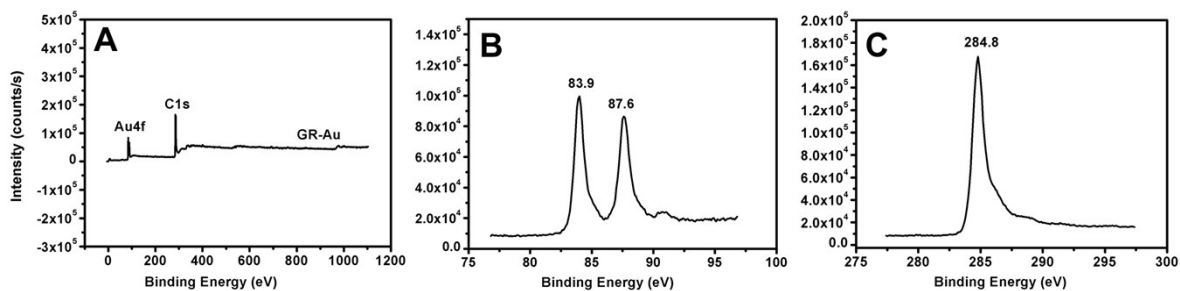

**Fig. S4.** XPS spectrum of (A) GR-Au nanocomposite, high-resolution XPS of (B) C 1s spectrum and (C) Au 4f spectrum.

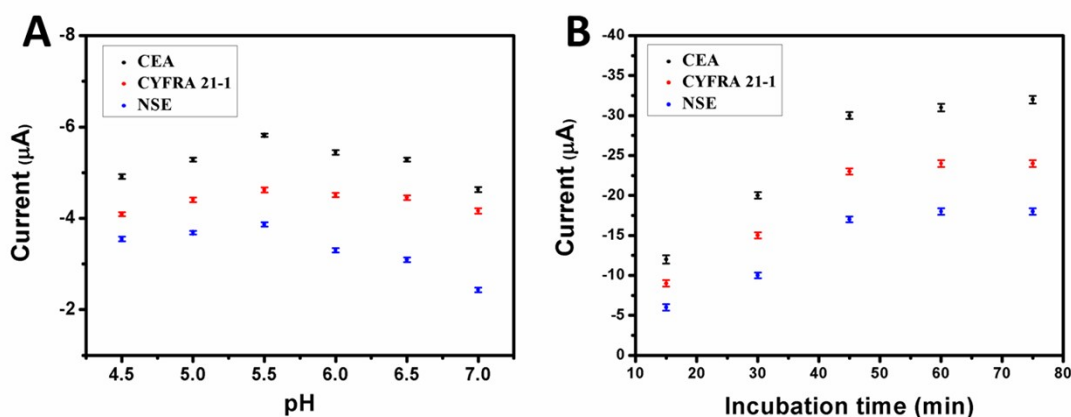

**Fig. S5.** Effect of (A) pH of detection solution on SWV responses to 0.02 ng mL<sup>-1</sup> CEA, CYFRA21-1 and NSE and (B) incubation time on SWV responses to 20 ng mL<sup>-1</sup> CEA, CYFRA21-1 and NSE at the immunosensor array.

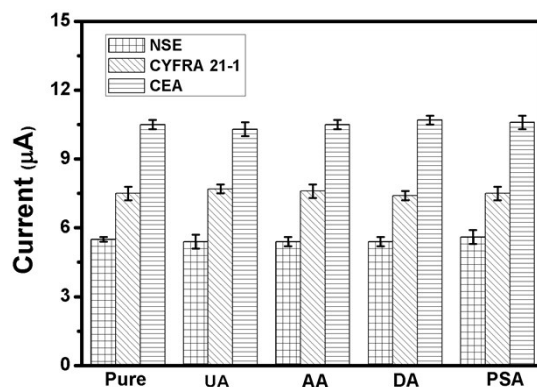

**Fig. S6.** The specificity of the immunosensor to  $0.1 \text{ ng mL}^{-1}$  CEA, CYFRA21-1 and NSE;  $0.1 \text{ ng mL}^{-1}$  CEA, CYFRA21-1 and NSE +  $10 \text{ ng mL}^{-1}$  UA;  $0.1 \text{ ng mL}^{-1}$  CEA, CYFRA21-1 and NSE +  $10 \text{ ng mL}^{-1}$  AA;  $0.1 \text{ ng mL}^{-1}$  CEA, CYFRA21-1 and NSE +  $10 \text{ ng mL}^{-1}$  DA;  $0.1 \text{ ng mL}^{-1}$  CEA, CYFRA21-1 and NSE +  $10 \text{ ng mL}^{-1}$  PSA (the error bars are standard deviations for  $n=3$ ).

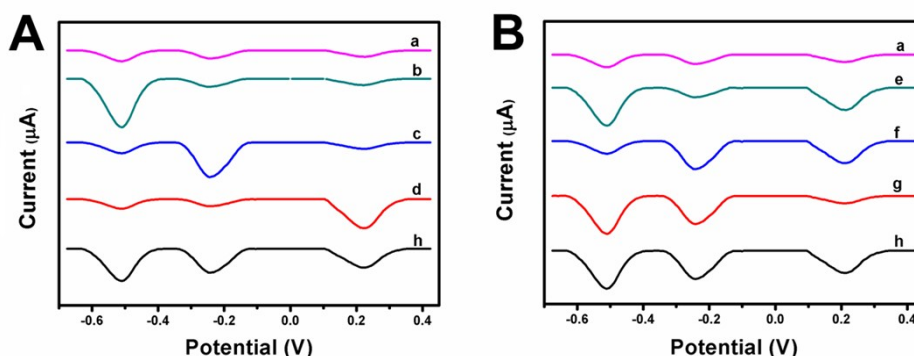

**Fig. S7.** Typical SWV responses for the investigation of cross-reactivity. (A) Solutions containing: (a)  $0 \text{ ng mL}^{-1}$  CEA,  $0 \text{ ng mL}^{-1}$  CYFRA21-1 and  $0 \text{ ng mL}^{-1}$  NSE, (b)  $0.1 \text{ ng mL}^{-1}$  CEA, (c)  $0.1 \text{ ng mL}^{-1}$  CYFRA21-1, (d)  $0.1 \text{ ng mL}^{-1}$  NSE, (e)  $0.2 \text{ ng mL}^{-1}$  CEA,  $0.2 \text{ ng mL}^{-1}$  CYFRA21-1 and  $0.2 \text{ ng mL}^{-1}$  NSE; (B) Solutions containing: (a)  $0 \text{ ng mL}^{-1}$  CEA,  $0 \text{ ng mL}^{-1}$  CYFRA21-1 and  $0 \text{ ng mL}^{-1}$  NSE, (b)  $1 \text{ ng mL}^{-1}$  CEA and  $1 \text{ ng mL}^{-1}$  NSE (c)  $1 \text{ ng mL}^{-1}$  CYFRA21-1 and  $1 \text{ ng mL}^{-1}$  NSE, (d)  $1 \text{ ng mL}^{-1}$  CEA and  $1 \text{ ng mL}^{-1}$  CYFRA21-1, (e)  $2 \text{ ng mL}^{-1}$  CEA,  $2 \text{ ng mL}^{-1}$  CYFRA21-1 and  $2 \text{ ng mL}^{-1}$  NSE.

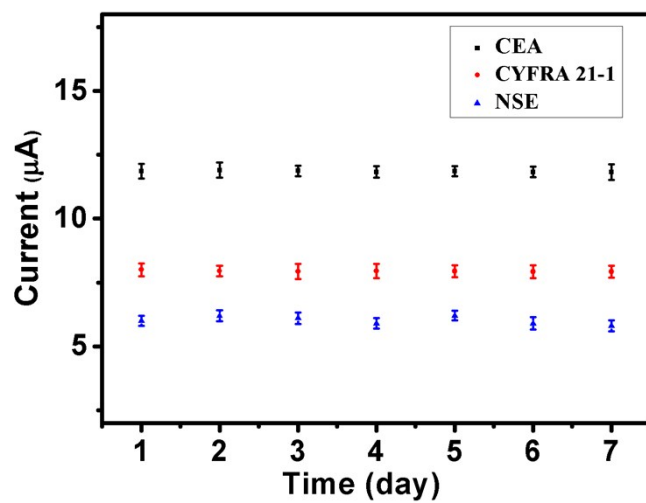

**Fig. S8.** The stability of the immunosensor for the detection of  $0.1 \text{ ng mL}^{-1}$  CEA, CYFRA21-1 and NSE.
